# Supplementary material
Source: publisher figshare collection journal article supplement (https://acs.figshare.com/ndownloader/files/4778494)
Supplement: Supplementary file 1 [file 4778494]

  
data_ejc121t 
  
_audit_creation_method            SHELXL-97 
_chemical_name_systematic 
; 
 ? 
; 
_chemical_name_common             ? 
_chemical_melting_point           ? 
_chemical_formula_moiety          ? 
_chemical_formula_sum 
 'C27.50 H28 Cl4 I N3 O4' 
_chemical_formula_weight          733.23 
  
loop_ 
 _atom_type_symbol 
 _atom_type_description 
 _atom_type_scat_dispersion_real 
 _atom_type_scat_dispersion_imag 
 _atom_type_scat_source 
 'C'  'C'   0.0033   0.0016 
 'International Tables Vol C Tables 4.2.6.8 and 6.1.1.4' 
 'H'  'H'   0.0000   0.0000 
 'International Tables Vol C Tables 4.2.6.8 and 6.1.1.4' 
 'N'  'N'   0.0061   0.0033 
 'International Tables Vol C Tables 4.2.6.8 and 6.1.1.4' 
 'O'  'O'   0.0106   0.0060 
 'International Tables Vol C Tables 4.2.6.8 and 6.1.1.4' 
 'Cl'  'Cl'   0.1484   0.1585 
 'International Tables Vol C Tables 4.2.6.8 and 6.1.1.4' 
 'I'  'I'  -0.4742   1.8119 
 'International Tables Vol C Tables 4.2.6.8 and 6.1.1.4' 
  
_symmetry_cell_setting            Monoclinic 
_symmetry_space_group_name_H-M    P2/c 
  
loop_ 
 _symmetry_equiv_pos_as_xyz 
 'x, y, z' 
 '-x, y, -z+1/2' 
 '-x, -y, -z' 
 'x, -y, z-1/2' 
  
_cell_length_a                    20.041(8) 
_cell_length_b                    9.284(4) 
_cell_length_c                    21.351(8) 
_cell_angle_alpha                 90.00 
_cell_angle_beta                  104.917(7) 
_cell_angle_gamma                 90.00 
_cell_volume                      3839(3) 
_cell_formula_units_Z             4 
_cell_measurement_temperature     293(2) 
_cell_measurement_reflns_used     550 
_cell_measurement_theta_min       2.40 
_cell_measurement_theta_max       17.65 
  
_exptl_crystal_description        plate 
_exptl_crystal_colour             colorless 
_exptl_crystal_size_max           0.12 
_exptl_crystal_size_mid           0.12 
_exptl_crystal_size_min           0.02 
_exptl_crystal_density_meas       ? 
_exptl_crystal_density_diffrn     1.269 
_exptl_crystal_density_method     'not measured' 
_exptl_crystal_F_000              1468 
_exptl_absorpt_coefficient_mu     1.142 
_exptl_absorpt_correction_type    Empirical 
_exptl_absorpt_correction_T_min   0.8751 
_exptl_absorpt_correction_T_max   0.9775 
_exptl_absorpt_process_details    SADABS
  
_exptl_special_details 
; 
Data was collected using a BRUKER SMART CCD (charge coupled device) based 
diffractometer equipped with an oxford low-temperature apparatus perating at 
193 K.  A suitable crystal was chosen and mounted on a glass fiber using 
grease. Data were measured using omega scans of 0.3\% per frame for 45 s, 
such that a hemisphere was collected. A total of 1271 frames were collected 
with a final resolution of 0.80 \%A.  The first 50 frames  were recollected 
at the end of data collection to monitor for decay.  Cell parameters were 
retrieved using SMART software and refined using SAINT on all observed 
reflections. Data reduction was performed using the SAINT software which 
corrects for Lp and decay.  Absorption corrections were applied using SADABS 
based on Blessing,(1995). The structures are solved by the direct method 
using the SHELX-90 program and refined by least squares method on F2 SHELXL-93, 
incorporated in SHELXTL V6.1. 
  
All H atoms were placed in calculated positions and refined using a riding 
model. 
C-H(aromatic) = 0.94\%A and Uiso(H) = 1.2Ueq(C) 
C-H(alaphatic) = 0.99\%A and Uiso(H) = 1.2Ueq(C) 
CH2 = 0.98\%A and Uiso(H) = 1.2Ueq(C) 
CH3 = 0.97\%A and Uiso(H) = 1.5Ueq(C) 
N-H = 0.86 (0.92)\%A and Uiso(H) = 1.2 Ueq(N) 
O-H(alcohol) = 0.85\%A and Uiso(H) = 1.2Ueq(O) 
O-H(acid) = 0.82\%A and Uiso(H) = 1.5Ueq(O) 
; 
  
_diffrn_ambient_temperature       293(2) 
_diffrn_radiation_wavelength      0.71073 
_diffrn_radiation_type            MoK\a 
_diffrn_radiation_source          'normal-focus sealed tube' 
_diffrn_radiation_monochromator   graphite 
_diffrn_measurement_device_type   'Bruker CCD' 
_diffrn_measurement_method        '\w, 0.3 deg' 
_diffrn_detector_area_resol_mean  836.6 
_diffrn_standards_number          0 
_diffrn_standards_interval_count  0 
_diffrn_standards_interval_time   ? 
_diffrn_standards_decay_%         <1 
_diffrn_reflns_number             16136 
_diffrn_reflns_av_R_equivalents   0.0927 
_diffrn_reflns_av_sigmaI/netI     0.2485 
_diffrn_reflns_limit_h_min        -15 
_diffrn_reflns_limit_h_max        21 
_diffrn_reflns_limit_k_min        -9 
_diffrn_reflns_limit_k_max        9 
_diffrn_reflns_limit_l_min        -22 
_diffrn_reflns_limit_l_max        22 
_diffrn_reflns_theta_min          1.05 
_diffrn_reflns_theta_max          22.50 
_reflns_number_total              5012 
_reflns_number_gt                 1874 
_reflns_threshold_expression      >2sigma(I) 
  
_computing_data_collection        'ASTRO (BRUKER, V5.007, 1997)' 
_computing_cell_refinement        'SMART (BRUKER, V5.625, 2001)' 
_computing_data_reduction         'SAINT (BRUKER, V6.22, 2001)' 
_computing_structure_solution     'SHELXS-97 (Sheldrick, 1990)' 
_computing_structure_refinement   'SHELXL-97 (Sheldrick, 1997)' 
_computing_molecular_graphics     'SHELXTL (BRUKER, 2000, V6.1)' 
_computing_publication_material   'XCIF (Sheldrick and BRUKER, 1997, V5.1)' 
  
_refine_special_details 
; 
 Refinement of F^2^ against ALL reflections.  The weighted R-factor wR and 
 goodness of fit S are based on F^2^, conventional R-factors R are based 
 on F, with F set to zero for negative F^2^. The threshold expression of 
 F^2^ > 2sigma(F^2^) is used only for calculating R-factors(gt) etc. and is 
 not relevant to the choice of reflections for refinement.  R-factors based 
 on F^2^ are statistically about twice as large as those based on F, and R- 
 factors based on ALL data will be even larger. 
; 
  
_refine_ls_structure_factor_coef  Fsqd 
_refine_ls_matrix_type            full 
_refine_ls_weighting_scheme       calc 
_refine_ls_weighting_details 
 'calc w=1/[\s^2^(Fo^2^)+(0.1146P)^2^+0.0000P] where P=(Fo^2^+2Fc^2^)/3' 
_atom_sites_solution_primary      direct 
_atom_sites_solution_secondary    difmap 
_atom_sites_solution_hydrogens    geom 
_refine_ls_hydrogen_treatment     constr 
_refine_ls_extinction_method      none 
_refine_ls_extinction_coef        ? 
_refine_ls_number_reflns          5012 
_refine_ls_number_parameters      372 
_refine_ls_number_restraints      6 
_refine_ls_R_factor_all           0.1665 
_refine_ls_R_factor_gt            0.0746 
_refine_ls_wR_factor_ref          0.2622 
_refine_ls_wR_factor_gt           0.2419 
_refine_ls_goodness_of_fit_ref    0.944 
_refine_ls_restrained_S_all       0.947 
_refine_ls_shift/su_max           0.017 
_refine_ls_shift/su_mean          0.001 
  
loop_ 
 _atom_site_label 
 _atom_site_type_symbol 
 _atom_site_fract_x 
 _atom_site_fract_y 
 _atom_site_fract_z 
 _atom_site_U_iso_or_equiv 
 _atom_site_adp_type 
 _atom_site_occupancy 
 _atom_site_symmetry_multiplicity 
 _atom_site_calc_flag 
 _atom_site_refinement_flags 
 _atom_site_disorder_assembly 
 _atom_site_disorder_group 
Cl1 Cl 0.8087(3) 0.9518(5) 0.2750(2) 0.0746(16) Uani 1 1 d . . . 
Cl2 Cl 0.6748(2) 0.9845(5) 0.1826(2) 0.0596(14) Uani 1 1 d . . . 
Cl3 Cl 0.6889(3) 0.8241(5) 0.2994(3) 0.0923(19) Uani 1 1 d . . . 
O1 O 0.8700(7) 0.1986(15) 0.1650(7) 0.083(4) Uani 1 1 d . . . 
O2 O 0.7310(6) 0.6119(13) 0.2289(6) 0.058(4) Uani 1 1 d . . . 
O3 O 0.9973(6) 0.2222(18) 0.1529(7) 0.093(5) Uani 1 1 d . . . 
O4 O 0.6400(5) 0.6698(12) 0.0628(5) 0.049(3) Uani 1 1 d . . . 
N1 N 0.8835(7) 0.4322(15) 0.1410(6) 0.035(3) Uani 1 1 d . . . 
N2 N 0.7671(6) 0.7277(14) 0.1512(6) 0.034(3) Uani 1 1 d . . . 
N3 N 0.6597(6) 0.6714(14) -0.1605(6) 0.042(4) Uani 1 1 d . . . 
C1 C 0.8451(10) 0.317(2) 0.1494(8) 0.049(5) Uani 1 1 d . . . 
C2 C 0.7710(9) 0.3364(19) 0.1424(7) 0.046(5) Uani 1 1 d . . . 
H2 H 0.7448 0.2552 0.1456 0.056 Uiso 1 1 calc R . . 
C3 C 0.7387(8) 0.4629(19) 0.1317(7) 0.041(4) Uani 1 1 d . . . 
H3 H 0.6928 0.4706 0.1331 0.049 Uiso 1 1 calc R . . 
C4 C 0.7769(8) 0.5938(17) 0.1174(7) 0.030(4) Uani 1 1 d . . . 
C5 C 0.8526(8) 0.5680(19) 0.1348(6) 0.032(4) Uani 1 1 d . . . 
C6 C 0.9005(8) 0.6714(17) 0.1485(7) 0.035(4) Uani 1 1 d . . . 
C7 C 0.8815(8) 0.8254(16) 0.1511(8) 0.044(5) Uani 1 1 d . . . 
H7A H 0.9025 0.8803 0.1226 0.053 Uiso 1 1 calc R . . 
H7B H 0.9000 0.8609 0.1949 0.053 Uiso 1 1 calc R . . 
C8 C 0.8041(7) 0.8497(16) 0.1315(7) 0.036(4) Uani 1 1 d . . . 
H8A H 0.7933 0.9374 0.1516 0.043 Uiso 1 1 calc R . . 
H8B H 0.7888 0.8618 0.0848 0.043 Uiso 1 1 calc R . . 
C9 C 0.9667(8) 0.602(2) 0.1626(7) 0.037(4) Uani 1 1 d . . . 
C10 C 0.9546(8) 0.453(2) 0.1578(7) 0.037(4) Uani 1 1 d . . . 
C11 C 1.0101(11) 0.364(2) 0.1660(8) 0.054(5) Uani 1 1 d . . . 
C12 C 1.0760(10) 0.418(3) 0.1833(8) 0.064(6) Uani 1 1 d . . . 
H12 H 1.1134 0.3555 0.1904 0.077 Uiso 1 1 calc R . . 
C13 C 1.0877(10) 0.568(3) 0.1905(8) 0.068(6) Uani 1 1 d . . . 
H13 H 1.1326 0.6031 0.2028 0.082 Uiso 1 1 calc R . . 
C14 C 1.0327(10) 0.660(2) 0.1792(8) 0.057(5) Uani 1 1 d . . . 
H14 H 1.0393 0.7596 0.1826 0.069 Uiso 1 1 calc R . . 
C15 C 0.7422(8) 0.718(2) 0.2044(8) 0.040(4) Uani 1 1 d . . . 
C16 C 0.7293(8) 0.8618(18) 0.2366(8) 0.050(5) Uani 1 1 d . . . 
C17 C 1.0522(13) 0.117(3) 0.1739(17) 0.23(2) Uani 1 1 d . . . 
H17A H 1.0961 0.1646 0.1816 0.343 Uiso 1 1 calc R . . 
H17B H 1.0488 0.0455 0.1408 0.343 Uiso 1 1 calc R . . 
H17C H 1.0480 0.0719 0.2131 0.343 Uiso 1 1 calc R . . 
C18 C 0.7448(8) 0.6184(16) 0.0436(7) 0.032(4) Uani 1 1 d . . . 
C19 C 0.6762(8) 0.6532(17) 0.0185(8) 0.037(4) Uani 1 1 d . . . 
C20 C 0.6483(8) 0.6682(15) -0.0475(7) 0.035(4) Uani 1 1 d . . . 
H20 H 0.6018 0.6899 -0.0640 0.042 Uiso 1 1 calc R . . 
C21 C 0.6916(9) 0.6500(16) -0.0891(7) 0.035(4) Uani 1 1 d . . . 
C22 C 0.7590(8) 0.6129(16) -0.0673(7) 0.039(4) Uani 1 1 d . . . 
H22 H 0.7868 0.5983 -0.0956 0.047 Uiso 1 1 calc R . . 
C23 C 0.7850(8) 0.5976(16) -0.0001(7) 0.038(4) Uani 1 1 d . . . 
H23 H 0.8311 0.5724 0.0161 0.046 Uiso 1 1 calc R . . 
C24 C 0.5661(8) 0.696(2) 0.0394(9) 0.090(7) Uani 1 1 d . . . 
H24A H 0.5585 0.7801 0.0121 0.135 Uiso 1 1 calc R . . 
H24B H 0.5468 0.7121 0.0756 0.135 Uiso 1 1 calc R . . 
H24C H 0.5442 0.6146 0.0151 0.135 Uiso 1 1 calc R . . 
C25 C 0.6194(8) 0.8136(16) -0.1748(7) 0.049(5) Uani 1 1 d . . . 
H25A H 0.5835 0.8147 -0.1524 0.074 Uiso 1 1 calc R . . 
H25B H 0.5993 0.8219 -0.2206 0.074 Uiso 1 1 calc R . . 
H25C H 0.6503 0.8929 -0.1603 0.074 Uiso 1 1 calc R . . 
C26 C 0.6084(8) 0.5468(17) -0.1867(8) 0.060(5) Uani 1 1 d . . . 
H26A H 0.6332 0.4574 -0.1827 0.090 Uiso 1 1 calc R . . 
H26B H 0.5858 0.5641 -0.2314 0.090 Uiso 1 1 calc R . . 
H26C H 0.5746 0.5419 -0.1621 0.090 Uiso 1 1 calc R . . 
C27 C 0.7117(8) 0.672(2) -0.2008(7) 0.062(6) Uani 1 1 d . . . 
H27A H 0.7475 0.7404 -0.1833 0.093 Uiso 1 1 calc R . . 
H27B H 0.6891 0.6973 -0.2447 0.093 Uiso 1 1 calc R . . 
H27C H 0.7317 0.5774 -0.2001 0.093 Uiso 1 1 calc R . . 
I1 I 0.55830(6) 0.28973(15) 0.13256(6) 0.0623(5) Uani 1 1 d . . . 
Cl1S Cl 0.6392(18) 0.295(3) 0.9461(17) 0.178(14) Uiso 0.25 1 d PD . . 
Cl2S Cl 0.6696(17) 0.028(3) 1.0066(16) 0.170(13) Uiso 0.25 1 d PD . . 
C1S C 0.6022(17) 0.138(5) 0.968(3) 0.06(2) Uiso 0.25 1 d PD . . 
H1SA H 0.5730 0.1610 0.9961 0.075 Uiso 0.25 1 calc PR . . 
H1SB H 0.5743 0.0910 0.9292 0.075 Uiso 0.25 1 calc PR . . 
Cl3S Cl 0.156(2) 0.882(5) 0.029(3) 0.26(2) Uiso 0.25 1 d PD . . 
Cl4S Cl 0.046(3) 0.664(5) 0.010(3) 0.33(3) Uiso 0.25 1 d PD . . 
C2S C 0.072(2) 0.843(5) 0.028(3) 0.041(18) Uiso 0.25 1 d PD . . 
H2SA H 0.0419 0.9051 -0.0029 0.049 Uiso 0.25 1 calc PR . . 
H2SB H 0.0658 0.8659 0.0707 0.049 Uiso 0.25 1 calc PR . . 
  
loop_ 
 _atom_site_aniso_label 
 _atom_site_aniso_U_11 
 _atom_site_aniso_U_22 
 _atom_site_aniso_U_33 
 _atom_site_aniso_U_23 
 _atom_site_aniso_U_13 
 _atom_site_aniso_U_12 
Cl1 0.085(4) 0.067(4) 0.059(3) -0.020(3) -0.004(3) -0.009(3) 
Cl2 0.056(3) 0.049(3) 0.075(4) 0.005(3) 0.017(3) 0.011(2) 
Cl3 0.152(6) 0.066(4) 0.084(4) -0.008(3) 0.076(4) -0.005(4) 
O1 0.072(10) 0.060(10) 0.122(13) 0.018(9) 0.036(9) 0.015(8) 
O2 0.091(10) 0.034(8) 0.055(9) 0.006(7) 0.028(7) -0.014(7) 
O3 0.059(9) 0.082(11) 0.127(13) -0.015(10) 0.000(8) 0.013(9) 
O4 0.030(7) 0.082(10) 0.032(7) 0.003(6) 0.004(6) 0.011(6) 
N1 0.038(10) 0.024(9) 0.037(9) 0.008(7) 0.000(7) -0.004(8) 
N2 0.029(8) 0.039(10) 0.031(8) -0.003(7) 0.004(6) -0.005(7) 
N3 0.038(8) 0.050(11) 0.038(9) -0.009(7) 0.006(7) -0.003(7) 
C1 0.051(14) 0.053(16) 0.035(11) 0.002(10) -0.005(9) 0.031(13) 
C2 0.063(14) 0.037(13) 0.036(11) 0.003(9) 0.007(9) -0.007(10) 
C3 0.043(11) 0.052(13) 0.023(10) 0.003(9) 0.002(8) -0.005(11) 
C4 0.036(11) 0.032(12) 0.024(10) 0.003(8) 0.010(8) -0.002(8) 
C5 0.033(11) 0.046(13) 0.013(9) 0.008(8) -0.001(7) -0.002(10) 
C6 0.039(11) 0.037(13) 0.026(9) 0.003(8) 0.004(8) -0.006(10) 
C7 0.049(12) 0.035(12) 0.048(11) 0.008(9) 0.011(9) -0.010(9) 
C8 0.037(11) 0.040(11) 0.031(10) -0.004(8) 0.009(8) -0.004(9) 
C9 0.018(11) 0.061(15) 0.025(10) 0.006(9) -0.008(7) 0.000(10) 
C10 0.027(12) 0.046(14) 0.030(10) 0.000(9) -0.007(8) 0.014(11) 
C11 0.064(16) 0.043(14) 0.048(13) -0.006(10) 0.005(11) -0.014(13) 
C12 0.042(14) 0.10(2) 0.043(13) -0.008(13) 0.004(10) 0.024(13) 
C13 0.047(14) 0.11(2) 0.045(13) -0.018(13) 0.005(10) -0.009(15) 
C14 0.054(13) 0.072(15) 0.043(12) -0.007(10) 0.006(10) 0.015(13) 
C15 0.046(11) 0.034(12) 0.034(11) -0.014(11) 0.002(9) 0.007(10) 
C16 0.062(12) 0.054(13) 0.038(11) 0.007(10) 0.020(9) 0.002(10) 
C17 0.12(2) 0.13(3) 0.33(5) -0.09(3) -0.11(3) 0.10(2) 
C18 0.034(11) 0.031(10) 0.032(10) 0.002(8) 0.006(9) -0.006(8) 
C19 0.021(10) 0.054(13) 0.033(11) -0.004(9) -0.001(9) 0.003(8) 
C20 0.030(10) 0.040(12) 0.030(10) -0.003(8) 0.000(8) 0.002(8) 
C21 0.048(12) 0.032(11) 0.020(10) 0.002(8) -0.001(9) -0.002(9) 
C22 0.039(11) 0.053(12) 0.024(10) 0.000(8) 0.004(8) 0.007(9) 
C23 0.032(10) 0.040(12) 0.037(11) 0.014(9) -0.002(9) 0.006(8) 
C24 0.039(12) 0.17(2) 0.063(14) 0.013(14) 0.012(10) 0.022(13) 
C25 0.061(12) 0.033(12) 0.047(11) 0.006(9) 0.002(9) 0.017(9) 
C26 0.066(13) 0.043(12) 0.060(13) -0.009(10) -0.003(10) -0.013(10) 
C27 0.047(12) 0.108(18) 0.031(11) -0.002(10) 0.011(9) -0.003(11) 
I1 0.0387(7) 0.1024(11) 0.0395(7) 0.0109(8) -0.0014(5) -0.0026(8) 
  
_geom_special_details 
; 
 All esds (except the esd in the dihedral angle between two l.s. planes) 
 are estimated using the full covariance matrix.  The cell esds are taken 
 into account individually in the estimation of esds in distances, angles 
 and torsion angles; correlations between esds in cell parameters are only 
 used when they are defined by crystal symmetry.  An approximate (isotropic) 
 treatment of cell esds is used for estimating esds involving l.s. planes. 
; 
  
loop_ 
 _geom_bond_atom_site_label_1 
 _geom_bond_atom_site_label_2 
 _geom_bond_distance 
 _geom_bond_site_symmetry_2 
 _geom_bond_publ_flag 
Cl1 C16 1.797(17) . ? 
Cl2 C16 1.780(17) . ? 
Cl3 C16 1.770(16) . ? 
O1 C1 1.221(18) . ? 
O2 C15 1.165(18) . ? 
O3 C11 1.360(19) . ? 
O3 C17 1.45(2) . ? 
O4 C19 1.340(17) . ? 
O4 C24 1.458(17) . ? 
N1 C1 1.35(2) . ? 
N1 C10 1.390(18) . ? 
N1 C5 1.396(18) . ? 
N2 C15 1.358(19) . ? 
N2 C8 1.474(17) . ? 
N2 C4 1.475(18) . ? 
N3 C21 1.506(18) . ? 
N3 C27 1.514(18) . ? 
N3 C25 1.536(17) . ? 
N3 C26 1.553(17) . ? 
C1 C2 1.47(2) . ? 
C2 C3 1.331(19) . ? 
C2 H2 0.9300 . ? 
C3 C4 1.51(2) . ? 
C3 H3 0.9300 . ? 
C4 C5 1.485(19) . ? 
C4 C18 1.559(19) . ? 
C5 C6 1.336(19) . ? 
C6 C9 1.44(2) . ? 
C6 C7 1.48(2) . ? 
C7 C8 1.515(18) . ? 
C7 H7A 0.9700 . ? 
C7 H7B 0.9700 . ? 
C8 H8A 0.9700 . ? 
C8 H8B 0.9700 . ? 
C9 C14 1.39(2) . ? 
C9 C10 1.40(2) . ? 
C10 C11 1.36(2) . ? 
C11 C12 1.37(2) . ? 
C12 C13 1.41(2) . ? 
C12 H12 0.9300 . ? 
C13 C14 1.37(2) . ? 
C13 H13 0.9300 . ? 
C14 H14 0.9300 . ? 
C15 C16 1.55(2) . ? 
C17 H17A 0.9600 . ? 
C17 H17B 0.9600 . ? 
C17 H17C 0.9600 . ? 
C18 C19 1.380(18) . ? 
C18 C23 1.393(19) . ? 
C19 C20 1.383(19) . ? 
C20 C21 1.40(2) . ? 
C20 H20 0.9300 . ? 
C21 C22 1.355(19) . ? 
C22 C23 1.402(19) . ? 
C22 H22 0.9300 . ? 
C23 H23 0.9300 . ? 
C24 H24A 0.9600 . ? 
C24 H24B 0.9600 . ? 
C24 H24C 0.9600 . ? 
C25 H25A 0.9600 . ? 
C25 H25B 0.9600 . ? 
C25 H25C 0.9600 . ? 
C26 H26A 0.9600 . ? 
C26 H26B 0.9600 . ? 
C26 H26C 0.9600 . ? 
C27 H27A 0.9600 . ? 
C27 H27B 0.9600 . ? 
C27 H27C 0.9600 . ? 
Cl1S C1S 1.75(2) . ? 
Cl2S C1S 1.73(2) . ? 
C1S H1SA 0.9700 . ? 
C1S H1SB 0.9700 . ? 
Cl3S C2S 1.72(2) . ? 
Cl4S C2S 1.76(2) . ? 
C2S H2SA 0.9700 . ? 
C2S H2SB 0.9700 . ? 
  
loop_ 
 _geom_angle_atom_site_label_1 
 _geom_angle_atom_site_label_2 
 _geom_angle_atom_site_label_3 
 _geom_angle 
 _geom_angle_site_symmetry_1 
 _geom_angle_site_symmetry_3 
 _geom_angle_publ_flag 
C11 O3 C17 120.0(17) . . ? 
C19 O4 C24 117.7(12) . . ? 
C1 N1 C10 131.1(15) . . ? 
C1 N1 C5 118.0(14) . . ? 
C10 N1 C5 107.3(13) . . ? 
C15 N2 C8 127.6(14) . . ? 
C15 N2 C4 118.6(13) . . ? 
C8 N2 C4 111.6(12) . . ? 
C21 N3 C27 113.6(12) . . ? 
C21 N3 C25 112.3(11) . . ? 
C27 N3 C25 106.8(12) . . ? 
C21 N3 C26 109.6(12) . . ? 
C27 N3 C26 106.5(12) . . ? 
C25 N3 C26 107.6(11) . . ? 
O1 C1 N1 122.8(17) . . ? 
O1 C1 C2 118(2) . . ? 
N1 C1 C2 119.2(16) . . ? 
C3 C2 C1 123.9(17) . . ? 
C3 C2 H2 118.0 . . ? 
C1 C2 H2 118.0 . . ? 
C2 C3 C4 119.7(15) . . ? 
C2 C3 H3 120.1 . . ? 
C4 C3 H3 120.1 . . ? 
N2 C4 C5 105.6(12) . . ? 
N2 C4 C3 116.2(13) . . ? 
C5 C4 C3 111.0(13) . . ? 
N2 C4 C18 107.4(12) . . ? 
C5 C4 C18 113.9(12) . . ? 
C3 C4 C18 102.9(12) . . ? 
C6 C5 N1 110.6(14) . . ? 
C6 C5 C4 124.7(16) . . ? 
N1 C5 C4 124.7(14) . . ? 
C5 C6 C9 107.2(15) . . ? 
C5 C6 C7 121.5(15) . . ? 
C9 C6 C7 131.2(15) . . ? 
C6 C7 C8 112.8(12) . . ? 
C6 C7 H7A 109.0 . . ? 
C8 C7 H7A 109.0 . . ? 
C6 C7 H7B 109.0 . . ? 
C8 C7 H7B 109.0 . . ? 
H7A C7 H7B 107.8 . . ? 
N2 C8 C7 111.1(12) . . ? 
N2 C8 H8A 109.4 . . ? 
C7 C8 H8A 109.4 . . ? 
N2 C8 H8B 109.4 . . ? 
C7 C8 H8B 109.4 . . ? 
H8A C8 H8B 108.0 . . ? 
C14 C9 C10 122.8(16) . . ? 
C14 C9 C6 130.0(18) . . ? 
C10 C9 C6 107.2(14) . . ? 
C11 C10 N1 134.1(18) . . ? 
C11 C10 C9 117.9(16) . . ? 
N1 C10 C9 107.8(14) . . ? 
O3 C11 C10 117.3(18) . . ? 
O3 C11 C12 122(2) . . ? 
C10 C11 C12 120.8(19) . . ? 
C11 C12 C13 120.7(18) . . ? 
C11 C12 H12 119.6 . . ? 
C13 C12 H12 119.6 . . ? 
C14 C13 C12 119.7(18) . . ? 
C14 C13 H13 120.1 . . ? 
C12 C13 H13 120.1 . . ? 
C13 C14 C9 117.9(18) . . ? 
C13 C14 H14 121.1 . . ? 
C9 C14 H14 121.1 . . ? 
O2 C15 N2 125.8(16) . . ? 
O2 C15 C16 117.2(16) . . ? 
N2 C15 C16 117.0(16) . . ? 
C15 C16 Cl3 109.0(12) . . ? 
C15 C16 Cl2 114.1(11) . . ? 
Cl3 C16 Cl2 107.0(9) . . ? 
C15 C16 Cl1 111.9(11) . . ? 
Cl3 C16 Cl1 105.7(9) . . ? 
Cl2 C16 Cl1 108.8(9) . . ? 
O3 C17 H17A 109.5 . . ? 
O3 C17 H17B 109.5 . . ? 
H17A C17 H17B 109.5 . . ? 
O3 C17 H17C 109.5 . . ? 
H17A C17 H17C 109.5 . . ? 
H17B C17 H17C 109.5 . . ? 
C19 C18 C23 117.5(14) . . ? 
C19 C18 C4 122.5(14) . . ? 
C23 C18 C4 119.9(13) . . ? 
O4 C19 C18 114.8(14) . . ? 
O4 C19 C20 123.9(14) . . ? 
C18 C19 C20 121.3(16) . . ? 
C19 C20 C21 118.7(14) . . ? 
C19 C20 H20 120.7 . . ? 
C21 C20 H20 120.7 . . ? 
C22 C21 C20 122.5(14) . . ? 
C22 C21 N3 120.5(15) . . ? 
C20 C21 N3 117.0(14) . . ? 
C21 C22 C23 116.9(15) . . ? 
C21 C22 H22 121.6 . . ? 
C23 C22 H22 121.6 . . ? 
C18 C23 C22 123.1(14) . . ? 
C18 C23 H23 118.5 . . ? 
C22 C23 H23 118.5 . . ? 
O4 C24 H24A 109.5 . . ? 
O4 C24 H24B 109.5 . . ? 
H24A C24 H24B 109.5 . . ? 
O4 C24 H24C 109.5 . . ? 
H24A C24 H24C 109.5 . . ? 
H24B C24 H24C 109.5 . . ? 
N3 C25 H25A 109.5 . . ? 
N3 C25 H25B 109.5 . . ? 
H25A C25 H25B 109.5 . . ? 
N3 C25 H25C 109.5 . . ? 
H25A C25 H25C 109.5 . . ? 
H25B C25 H25C 109.5 . . ? 
N3 C26 H26A 109.5 . . ? 
N3 C26 H26B 109.5 . . ? 
H26A C26 H26B 109.5 . . ? 
N3 C26 H26C 109.5 . . ? 
H26A C26 H26C 109.5 . . ? 
H26B C26 H26C 109.5 . . ? 
N3 C27 H27A 109.5 . . ? 
N3 C27 H27B 109.5 . . ? 
H27A C27 H27B 109.5 . . ? 
N3 C27 H27C 109.5 . . ? 
H27A C27 H27C 109.5 . . ? 
H27B C27 H27C 109.5 . . ? 
Cl2S C1S Cl1S 106.8(16) . . ? 
Cl2S C1S H1SA 110.4 . . ? 
Cl1S C1S H1SA 110.4 . . ? 
Cl2S C1S H1SB 110.4 . . ? 
Cl1S C1S H1SB 110.4 . . ? 
H1SA C1S H1SB 108.6 . . ? 
Cl3S C2S Cl4S 115.8(18) . . ? 
Cl3S C2S H2SA 108.3 . . ? 
Cl4S C2S H2SA 108.3 . . ? 
Cl3S C2S H2SB 108.3 . . ? 
Cl4S C2S H2SB 108.3 . . ? 
H2SA C2S H2SB 107.4 . . ? 
  
loop_ 
 _geom_torsion_atom_site_label_1 
 _geom_torsion_atom_site_label_2 
 _geom_torsion_atom_site_label_3 
 _geom_torsion_atom_site_label_4 
 _geom_torsion 
 _geom_torsion_site_symmetry_1 
 _geom_torsion_site_symmetry_2 
 _geom_torsion_site_symmetry_3 
 _geom_torsion_site_symmetry_4 
 _geom_torsion_publ_flag 
C10 N1 C1 O1 -13(3) . . . . ? 
C5 N1 C1 O1 -168.7(15) . . . . ? 
C10 N1 C1 C2 164.2(15) . . . . ? 
C5 N1 C1 C2 9(2) . . . . ? 
O1 C1 C2 C3 173.4(16) . . . . ? 
N1 C1 C2 C3 -4(2) . . . . ? 
C1 C2 C3 C4 8(2) . . . . ? 
C15 N2 C4 C5 -105.4(14) . . . . ? 
C8 N2 C4 C5 59.0(14) . . . . ? 
C15 N2 C4 C3 18.2(18) . . . . ? 
C8 N2 C4 C3 -177.4(11) . . . . ? 
C15 N2 C4 C18 132.7(13) . . . . ? 
C8 N2 C4 C18 -62.8(14) . . . . ? 
C2 C3 C4 N2 -136.0(15) . . . . ? 
C2 C3 C4 C5 -15.2(19) . . . . ? 
C2 C3 C4 C18 107.0(15) . . . . ? 
C1 N1 C5 C6 159.3(14) . . . . ? 
C10 N1 C5 C6 -1.7(16) . . . . ? 
C1 N1 C5 C4 -19(2) . . . . ? 
C10 N1 C5 C4 -179.8(13) . . . . ? 
N2 C4 C5 C6 -29.7(19) . . . . ? 
C3 C4 C5 C6 -156.5(14) . . . . ? 
C18 C4 C5 C6 87.9(18) . . . . ? 
N2 C4 C5 N1 148.2(13) . . . . ? 
C3 C4 C5 N1 21.4(19) . . . . ? 
C18 C4 C5 N1 -94.3(17) . . . . ? 
N1 C5 C6 C9 1.9(17) . . . . ? 
C4 C5 C6 C9 180.0(13) . . . . ? 
N1 C5 C6 C7 -174.7(13) . . . . ? 
C4 C5 C6 C7 3(2) . . . . ? 
C5 C6 C7 C8 -5(2) . . . . ? 
C9 C6 C7 C8 179.7(15) . . . . ? 
C15 N2 C8 C7 98.6(17) . . . . ? 
C4 N2 C8 C7 -64.1(15) . . . . ? 
C6 C7 C8 N2 33.5(17) . . . . ? 
C5 C6 C9 C14 179.5(16) . . . . ? 
C7 C6 C9 C14 -4(3) . . . . ? 
C5 C6 C9 C10 -1.4(17) . . . . ? 
C7 C6 C9 C10 174.7(15) . . . . ? 
C1 N1 C10 C11 28(3) . . . . ? 
C5 N1 C10 C11 -174.7(18) . . . . ? 
C1 N1 C10 C9 -156.8(16) . . . . ? 
C5 N1 C10 C9 0.7(16) . . . . ? 
C14 C9 C10 C11 -4(2) . . . . ? 
C6 C9 C10 C11 176.6(14) . . . . ? 
C14 C9 C10 N1 179.5(14) . . . . ? 
C6 C9 C10 N1 0.4(17) . . . . ? 
C17 O3 C11 C10 -166(2) . . . . ? 
C17 O3 C11 C12 17(3) . . . . ? 
N1 C10 C11 O3 3(3) . . . . ? 
C9 C10 C11 O3 -171.7(15) . . . . ? 
N1 C10 C11 C12 -179.9(17) . . . . ? 
C9 C10 C11 C12 5(2) . . . . ? 
O3 C11 C12 C13 173.9(17) . . . . ? 
C10 C11 C12 C13 -3(3) . . . . ? 
C11 C12 C13 C14 -1(3) . . . . ? 
C12 C13 C14 C9 2(3) . . . . ? 
C10 C9 C14 C13 1(2) . . . . ? 
C6 C9 C14 C13 179.8(16) . . . . ? 
C8 N2 C15 O2 -156.9(16) . . . . ? 
C4 N2 C15 O2 5(2) . . . . ? 
C8 N2 C15 C16 21(2) . . . . ? 
C4 N2 C15 C16 -177.1(12) . . . . ? 
O2 C15 C16 Cl3 -7.6(19) . . . . ? 
N2 C15 C16 Cl3 174.1(11) . . . . ? 
O2 C15 C16 Cl2 -127.1(14) . . . . ? 
N2 C15 C16 Cl2 54.6(17) . . . . ? 
O2 C15 C16 Cl1 108.9(15) . . . . ? 
N2 C15 C16 Cl1 -69.4(15) . . . . ? 
N2 C4 C18 C19 -59.1(18) . . . . ? 
C5 C4 C18 C19 -175.7(14) . . . . ? 
C3 C4 C18 C19 64.0(18) . . . . ? 
N2 C4 C18 C23 124.4(14) . . . . ? 
C5 C4 C18 C23 8(2) . . . . ? 
C3 C4 C18 C23 -112.5(16) . . . . ? 
C24 O4 C19 C18 -175.7(14) . . . . ? 
C24 O4 C19 C20 4(2) . . . . ? 
C23 C18 C19 O4 179.1(13) . . . . ? 
C4 C18 C19 O4 3(2) . . . . ? 
C23 C18 C19 C20 -1(2) . . . . ? 
C4 C18 C19 C20 -177.1(14) . . . . ? 
O4 C19 C20 C21 179.2(14) . . . . ? 
C18 C19 C20 C21 -1(2) . . . . ? 
C19 C20 C21 C22 3(2) . . . . ? 
C19 C20 C21 N3 -178.3(13) . . . . ? 
C27 N3 C21 C22 -9(2) . . . . ? 
C25 N3 C21 C22 -130.7(15) . . . . ? 
C26 N3 C21 C22 109.7(16) . . . . ? 
C27 N3 C21 C20 171.5(13) . . . . ? 
C25 N3 C21 C20 50.1(17) . . . . ? 
C26 N3 C21 C20 -69.5(16) . . . . ? 
C20 C21 C22 C23 -2(2) . . . . ? 
N3 C21 C22 C23 178.9(13) . . . . ? 
C19 C18 C23 C22 1(2) . . . . ? 
C4 C18 C23 C22 177.8(14) . . . . ? 
C21 C22 C23 C18 0(2) . . . . ? 
  
_diffrn_measured_fraction_theta_max    1.000 
_diffrn_reflns_theta_full              22.50 
_diffrn_measured_fraction_theta_full   1.000 
_refine_diff_density_max    1.407 
_refine_diff_density_min   -0.495 
_refine_diff_density_rms    0.181 
